1 **Title**

2 Exercise and training regulation of autophagy markers in human and rodent skeletal muscle.

3

4 **Authors**

5 Javier Botella<sup>1</sup>, Nicholas A. Jamnick<sup>1,2</sup>, Cesare Granata<sup>1,3</sup>, Amanda J. Genders<sup>1</sup>, Enrico Perri<sup>1,4</sup>,  
6 Tamim Jabar<sup>1</sup>, Andrew Garnham<sup>1</sup>, Michael Lazarou<sup>5</sup>, David J. Bishop<sup>1</sup>

7

8 **Affiliations**

9 1 Institute for Health and Sport (iHeS), Victoria University, Melbourne, Victoria, Australia.

10 2 Metabolic Research Unit, School of Medicine and Institute for Mental and Physical Health  
11 and Clinical Translation (IMPACT), Deakin University, Waurin Ponds, Victoria, Australia.

12 3 Department of Diabetes, Central Clinical School, Monash University, Melbourne, Victoria,  
13 Australia.

14 4 Department of Biomedical Sciences for Health, University of Milan, Italy

15 5 Department of Biochemistry and Molecular Biology, Biomedicine Discovery Institute,  
16 Monash University, Melbourne, Australia

17

18

19 **Corresponding authors:** J. Botella ([javier.botellaruiz@live.vu.edu.au](mailto:javier.botellaruiz@live.vu.edu.au)) and D.J. Bishop  
20 ([david.bishop@vu.edu.au](mailto:david.bishop@vu.edu.au)).

21

22 **Short running title:** Autophagy changes with exercise

23

24 **Abbreviations**

25 LC3, Microtubule-associated proteins 1A/1B light chain 3; p62, ubiquitin-binding protein p62;  
26 INH, inhibitors; MLSS, maximal lactate steady state; HIIE, high-intensity interval exercise;  
27 HIIT, high-intensity interval training; MICE, moderate-intensity continuous exercise; SIE,  
28 sprint-interval exercise; GXT, graded exercise test;  $\dot{V}O_{2peak}$ , peak oxygen uptake;  $\dot{V}O_{2max}$ ,  
29 maximal oxygen uptake  $W_{LT}$ , power at the lactate threshold;  $\dot{W}_{max}$ , maximal aerobic power.

30 **Abstract**

31 Autophagy is a key intracellular mechanism by which cells degrade old or dysfunctional  
32 proteins and organelles. In skeletal muscle, evidence suggests that exercise increases  
33 autophagosome content and autophagy flux. However, the exercise-induced response seems to  
34 differ between rodents and humans, and little is known about how different exercise  
35 prescription parameters may affect these results. The present study utilised skeletal muscle  
36 samples obtained from four different experimental studies using rats and humans. Here we  
37 show that following exercise, in the soleus muscle of Wistar rats, there is an increase in LC3B-  
38 I protein levels (+ 109%) immediately after exercise, and a subsequent increase in LC3B-II  
39 protein levels (+ 97%) 3 hours into the recovery. Conversely, in human skeletal muscle, there  
40 is an immediate exercise-induced decrease in LC3B-II protein levels (- 24%), independent of  
41 whether exercise is performed below or above the maximal lactate steady state, which returns  
42 to baseline 3.5 hours following recovery, while no change in LC3B-I protein levels is observed.  
43 p62 protein levels did not change in neither rats nor humans following exercise. By employing  
44 an *ex vivo* autophagy flux assay previously used in rodents we demonstrate that the exercise-  
45 induced decrease in LC3B-II protein levels in humans does not reflect a decreased autophagy  
46 flux. Instead, effect size analyses suggest a modest-to-large increase in autophagy flux  
47 following exercise that lasts up to 24 hours. Our findings suggest that exercise-induced changes  
48 in autophagosome content markers differ between rodents and humans, and that exercise-  
49 induced decrease in LC3B-II protein levels do not reflect autophagy flux level.

50

51 **Keywords:** autophagy, exercise, LC3, skeletal muscle.

## 52 Introduction

53 Autophagy is the cellular process by which an autophagosome (a double-membrane vesicle)  
54 engulfs, and delivers to the lysosome, proteins or organelles that need to be degraded. It is the  
55 recycling machinery of the cell and is important for the correct removal of intracellular  
56 pathogens or misfolded proteins, among others, which may activate deleterious cellular  
57 signalling pathways (e.g., inflammation) (1). In skeletal muscle, autophagy is important to  
58 prevent mitochondrial damage (2), as well as promoting positive muscle regeneration (3),  
59 optimal glucose metabolism (4), and for training-induced increases in mitochondrial proteins  
60 and endurance performance (5). Thus, it is important to better understand the factors that  
61 influence autophagy in skeletal muscle.

62 The autophagy machinery consists of a core set of autophagy-related (ATG) proteins (6).  
63 Among these, the ATG8 family (which includes the subfamily members LC3A, LC3B, LC3C,  
64 GABARAP, GABARAPL1, GABARAPL2) promote autophagosome formation and  
65 autophagosome-lysosome fusion (7, 8). In skeletal muscle LC3s are abundantly expressed (9),  
66 which makes LC3 a widely used marker of autophagosome content. In rodents, endurance  
67 exercise acutely increases the levels of LC3-II (and the LC3-II/I ratio) as well as the appearance  
68 of LC3 puncta in both skeletal and cardiac muscle (4). Similarly, endurance exercise to  
69 exhaustion increases LC3-II protein levels in the tibialis anterior, along with a tendency for  
70 increased exercise-induced autophagy flux, but unchanged protein levels of the autophagy  
71 receptor p62 (10). Following a similar exercise session in mice LC3-I protein levels have also  
72 been reported to increase (11). A study comparing two different exercise regimes in mice  
73 showed that both low- and moderate-intensity exercise increased LC3A/B-II protein levels and  
74 the LC3A/B-II/I ratio 3 hours following the end of exercise (12). Although findings are  
75 inconclusive with regard to exercise-induced p62 protein changes, the LC3 findings  
76 collectively suggest that autophagosome content, and possibly autophagy flux, are increased  
77 after endurance exercise in rodents.

78 In contrast to rodent studies, human studies show a distinct pattern of exercise-induced changes  
79 in autophagosome content markers. Protein levels of LC3B-II, and the LC3B-II/I ratio, have  
80 been shown to decrease 0 to 1 h following different types of endurance exercise and return to  
81 baseline values after 3 to 4 h of recovery in human skeletal muscle (13-16). In contrast, 60 min  
82 of exercise at 60% of  $\dot{V}O_{2max}$  has been reported to increase the levels of LC3A/B-II protein  
83 levels 2 h after the end of exercise (17). Following most types of endurance exercise, the protein

84 levels of the autophagy receptor p62 remained unchanged (13, 15-17). In contrast, following 2  
85 h at 70% of  $\dot{V}O_{2\text{peak}}$ , but not at 55% of  $\dot{V}O_{2\text{peak}}$ , the p62 protein levels decreased, which could  
86 suggest an effect of exercise intensity on the exercise-induced p62 protein changes (14).  
87 However, since both the exercise intensity and the total work completed were different, it is  
88 difficult to isolate any of these factors. Other differences such as training status, timing of  
89 biopsies, antibodies used, or sample size may also contribute to the reported discrepancies  
90 between human studies. Whether exercise intensity distinctly affects the LC3B and p62 protein  
91 levels changes following an exercise session remains to be fully elucidated.

92 Autophagy flux assays are considered the ‘gold-standard’ to assess autophagy levels (18).  
93 Autophagy flux is the term used for the combined autophagy steps, which includes  
94 autophagosome formation, maturation, fusion with lysosomes, and breakdown of the  
95 autolysosome contents. One such assay aims to chemically block the fusion of autophagosomes  
96 with the lysosome (the end-point of the degradation process) and to monitor the accumulation  
97 of LC3-II (18). Performing an *in vivo* autophagy flux is not ethically possible in human tissues  
98 and remains a limitation. This means that human studies have relied on markers of  
99 autophagosome and autophagy receptor protein levels (13-17). Although not previously used  
100 in humans, animal models have also utilised an *ex vivo* autophagy flux analysis (19).  
101 Implementing this *ex vivo* LC3-II flux assay could provide a direct assessment of autophagy in  
102 human studies and would avoid having to rely solely on indirect markers (i.e., LC3-II/I ratio).

103 Despite the increase in autophagy research in skeletal muscle, there is currently no consensus  
104 on the exercise-induced regulation of autophagosome content in skeletal muscle. The aims of  
105 the current study are multiple: 1) to assess potential differences in exercise-induced changes in  
106 LC3B and p62 protein between rodents and humans; 2) to elucidate if the exercise-induced  
107 LC3B and p62 protein changes are affected by exercise below or above the maximal lactate  
108 steady state (MLSS) in humans; 3) to explore the effects of exercise training on the basal LC3B  
109 and p62 protein levels in humans; and 4) to assess whether the exercise-induced changes in  
110 LC3B-II protein levels are reflective of a decreased *ex vivo* autophagy flux in humans.

## 111 **Materials and Methods**

112 Four different studies were included in this manuscript: a single exercise session in rats (Study  
113 1), exercise in humans at three different work-matched intensities above or below the maximal  
114 lactate steady state (MLSS) (Study 2), a 3-week high-volume high-intensity interval training  
115 in humans (Study 3), and a single exercise session in humans for the establishment of *ex vivo*

116 autophagy flux (Study 4). All human participants were deemed healthy, and their  
117 characteristics can be found in Table 1. Studies were performed at Victoria University  
118 (Melbourne, Australia), and all analyses were performed under similar conditions in the same  
119 laboratory. All studies were approved by the Victoria University Animal Ethics Committee and  
120 the Victoria University Human Research Ethics Committee. Informed consent was obtained  
121 from all human participants prior to study participation.

122 [Insert Figure 1 here]

## 123 **Study 1 – Exercise in rats**

### 124 **Overview**

125 Twenty-eight male Wistar rats (8 weeks old) were obtained from the Animal Resource Centre  
126 (Perth, Australia). The Victoria University Animal Ethics Committee approved this study  
127 (AEC 15/002). All procedures were performed according to the Australian Code of Practice  
128 for the Care and Use of Animals for Scientific Purposes (National Health and Medical Research  
129 Council, Australia, 8th Edition). Rats were housed in groups of 2 to 4 in a temperature-  
130 controlled room and maintained with a chow diet (Specialty Feeds, Perth, WA) and water ad  
131 libitum on a 12:12 h light-dark cycle, 18-22 °C, with approximately 50% humidity. The animals  
132 underwent acclimatisation over three days, using five separate 15 min running sessions  
133 (ranging from being placed on a non-moving treadmill belt to running at a speed of 0.25 m·s<sup>-1</sup>  
134 <sup>1</sup>). At least 48 h before the experimental exercise session, the animals performed an incremental  
135 exercise test. The incline of the treadmill was set at 10 degrees and the test was started at 0.16  
136 m·s<sup>-1</sup>. The speed of the treadmill was increased 0.05 m·s<sup>-1</sup> every three minutes. Animals were  
137 removed from the treadmill when they could no longer keep up with the speed despite  
138 encouragement (air puff).

### 139 **Experimental session**

140 On the experimental day, animals were exercised at 80% of their top speed achieved during the  
141 incremental test (approximately 0.38 m·s<sup>-1</sup> at a 10 degree incline) for seven 2-minute intervals  
142 interspersed with 1 minute of rest. Rats were humanely killed using 90 mg·kg<sup>-1</sup> i.p.  
143 pentobarbitone prior to (REST), immediately after (+0 h), or 3 h after the completion of the  
144 exercise protocol, and the soleus was removed and immediately frozen in liquid nitrogen and  
145 stored at -80 °C.

## 146 **Study 2 – Exercise in humans: effects of exercise intensity**

## 147 **Overview**

148 Ten healthy males volunteered for this study (Table 1). Participants were required to attend the  
149 laboratory at Victoria University 8 to 11 times. For the first trial, participants underwent a  
150 cycling graded exercise test (GXT) with 1-min increments as previously described (20). The  
151 following visits were dedicated to determining the maximal lactate steady state (MLSS), which  
152 was established by a series of 30-min constant power sessions. After the establishment of the  
153 MLSS, participants completed two constant power exercise sessions to exhaustion at +6% of  
154 the MLSS. Following this, they performed three experimental sessions that included skeletal  
155 muscle biopsies.

## 156 **Experimental session**

157 The three experimental sessions were performed in a randomised order at -18%, -6% or +6%  
158 of the MLSS. The MLSS was selected as the reference point because it is a critical intensity  
159 that delineates heavy from severe exercise intensity (21), and three intensities (2 below and 1  
160 above the MLSS) were chosen for the study. Participants were given 48 h of complete rest  
161 before each trial, and at least 7 days between the successive experimental trials. They were  
162 asked to maintain their normal diet and to replicate it on the day before and during the  
163 experimental trials. Biopsies were taken from the *vastus lateralis* muscle at rest before the start  
164 of exercise (REST), immediately upon completion of the exercise session (+ 0 h), and 3.5 h  
165 after the end of the exercise (+ 3.5 h). Samples were immediately cleaned of excess blood, fat,  
166 or connective tissue, and rapidly frozen in liquid nitrogen. Samples were stored at -80 °C until  
167 subsequent analyses.

## 168 **Study 3 - Exercise training in humans: effect of high-volume training**

### 169 **Overview**

170 Participants completed 20 days of twice-a-day high-intensity interval training (HIIT), as  
171 previously published (22, 23). Skeletal muscle biopsies were obtained at rest before (PRE) and  
172 after (POST) the 20 days of high-volume of HIIT.

### 173 **Experimental sessions**

174 Participants were given 48 h of rest before the sample collection. All samples were obtained  
175 from the *vastus lateralis* muscle and participants were provided standardised meals, as  
176 previously described (23, 24). Biopsies were taken at rest and were immediately cleaned of

177 excess blood, fat, or connective tissue, and rapidly frozen in liquid nitrogen and stored at -80  
178 °C for subsequent analyses.

## 179 **Study 4 – Exercise-induced autophagy flux in human skeletal muscle**

### 180 **Overview**

181 Samples from five healthy participants from a larger study were analysed. The GXT protocol  
182 utilised in this study was the same as in Study 2. Participants had been familiarised with the  
183 exercise required as they had undertaken two GXTs and two exercise sessions in the two weeks  
184 before the experimental session.

### 185 **Experimental session**

186 Two participants underwent the following exercise: six 30-s ‘all-out’ cycling bouts against a  
187 resistance initially set at 0.075 kg·kg body mass<sup>-1</sup> (~ 175%  $\dot{W}_{max}$ ), interspersed with a 4-min  
188 recovery period. The other three participants performed a session consisting of 90 minutes of  
189 continuous cycling at ~ 42% of  $\dot{W}_{max}$ . Participants were given 72 h of rest before the  
190 experimental session. All samples were obtained from the *vastus lateralis* muscle and  
191 participants were provided standardised meals, as in previous studies (23, 24). Biopsies were  
192 taken at rest before the start of exercise (REST), immediately upon completion of the exercise  
193 bout (+ 0 h), 2.5 hours into the recovery (+ 2.5 h), and 24 hours after the initial skeletal muscle  
194 sample (+ 24 h). Small muscle portions were immediately immersed into two separate vials  
195 with 3 mL of oxygenated DMEM, and the autophagy flux assay was started (see below in *ex*  
196 *vivo* autophagy flux assay). Once the protocol was finalised, samples were stored at -80 °C for  
197 subsequent analyses

### 198 **Skeletal Muscle Analyses**

#### 199 **Preparation of whole-muscle lysates**

200 Approximately 10 to 20 mg of frozen muscle was homogenised two times for two minutes at  
201 a speed of 30 Hz with a TyssueLyser instrument (Qiagen, Canada) in an ice-cold lysis buffer  
202 (1:20 w/v) containing 50 mM Tris-HCl, 150 mM NaCl, 1 mM EDTA, 5 mM Na<sub>4</sub>P<sub>2</sub>O<sub>7</sub>, 1 mM  
203 Na<sub>3</sub>V<sub>0</sub><sub>4</sub>, 1 % NP-40, with added protease and phosphatase inhibitors at a 1:100 concentration  
204 (Cell Signaling Technology). Protein concentration was determined using a commercial  
205 colourimetric assay (Bio-Rad Protein Assay kit II, Bio-Rad Laboratories Pty Ltd, Gladesville,



206 NSW, AUS) and lysates were then diluted with an equal volume in 2x Laemmli buffer  
207 containing 10% B-mercaptoethanol.

208

209 [Insert Table 1 here]

210

## 211 **Western blotting**

212 For each protein of interest, a signal linearity test was conducted to determine the ideal loading  
213 amount. Muscle lysates were then loaded in equal amounts (10 to 20 µg) and separated by  
214 electrophoresis for 1.5 to 2.5 h at 100 V using pre-cast stain-free SDS-PAGE gels (4-20%).  
215 Once resolved, the gels were wet transferred onto LF PVDF membranes using a Turbo Transfer  
216 system (Bio-rad Laboratories Pty Ltd, Gladesville, NSW, AUS). Membranes were blocked at  
217 room temperature for 1 h using 5% skim milk or 5% bovine serum albumin (BSA) in tris buffer  
218 saline (TBS) 0.1% tween-20 (TBS-T). After 3 x 5-min washes in TBS-T, membranes were  
219 incubated overnight at 4 °C with gentle agitation in primary antibody solutions (1:1000  
220 antibody in 5% BSA, plus 0.02% Na Azide). The antibody for LC3B was purchased from Cell  
221 Signalling (#3868S) and the antibody for p62 from Abcam (#ab56416). The following  
222 morning, membranes were washed 3 x 5-min in TBS-T and subsequently incubated under  
223 gentle agitation at room temperature with the appropriate host species-specific secondary  
224 antibody for 60-90 min in 1-5% skim milk in TBS-T. Membranes were washed again for 3 x  
225 5-min in TBS-T before being immersed for 5 min under gentle agitation at room temperature  
226 in Clarity ECL detection substrate (Bio-rad Laboratories Pty Ltd, Gladesville, NSW, AUS).  
227 Protein bands were visualised using a Bio-Rad ChemiDoc imaging system and band densities  
228 were determined using Bio-Rad ImageLab software (Bio-Rad Laboratories Pty Ltd,  
229 Gladesville, NSW, AUS). All samples for each participant were loaded on the same gel, along  
230 with different concentrations of a mixed-homogenate internal standard (IS), and a calibration  
231 curve plotted of density against protein amount. From the subsequent linear regression  
232 equation, protein abundance was calculated from the measured band intensity for each lane on  
233 the gel. Total protein content of each lane was obtained from the stain-free image of the  
234 membrane and was used for normalisation of the results.

## 235 ***Ex vivo* autophagy flux assay.**

236 The following protocol was adapted from previous studies performing ex vivo autophagy flux  
237 in rodents (19, 25). Upon collection of the skeletal muscle sample, two small pieces (~ 10 mg)  
238 were placed in 3 mL of oxygenated DMEM CO<sub>2</sub> independent media (ThermoFisher  
239 #18045088) at 37 °C. The tissues were then incubated with continuous oxygenation for 1 h  
240 with ('treated' sample, with inhibitors), or without ('untreated' sample), 60 µL of NH<sub>4</sub>Cl (20  
241 µL·mL<sup>-1</sup>; 40 mM; Sigma Aldrich #S7653) and 30 µL Leupeptin (10 µL·mL<sup>-1</sup>; 100 uM; Sigma  
242 Aldrich #L2884). Upon completion of a 1-h incubation, samples were snap-frozen and stored  
243 at -80 °C until further analysis. Autophagy flux (Net LC3B-II flux) was obtained by subtraction  
244 of the densitometric value of LC3B-II from treated compared to the untreated sample.

## 245 **Statistical analysis**

246 All values are reported as mean ± standard deviation (SD). All statistical analyses were carried  
247 out on the raw values normalised to the total protein loading and calibration curve. For Study  
248 1, one-way repeated-measures of ANOVA with Holm-Sidak post-hoc were used. For Study 2,  
249 two-way repeated measures of ANOVA were used, and main effects and interactions were  
250 further analysed using Holm-Sidak post-hoc tests. For Study 3, a two-tailed paired student's t-  
251 test was used. For Study 4, a one-way ANOVA with Holm-Sidak post-hoc tests were utilised.  
252 Effect sizes (ES) were quantified and defined as: small (0.2), moderate (0.5), large (0.8), and  
253 very large (1.3). Statistical significance was set at p < 0.05 for all analyses. GraphPad Prism  
254 8.3 software was used for the statistical analysis.

255

## 256 **Results**

### 257 **Study 1 - Exercise-induced changes in LC3B and p62 protein changes in soleus muscle of** 258 **Wistar rat.**

259 There was a main effect of time for LC3B-I and LC3B-II protein levels (both p = 0.01), as well  
260 as the LC3B-II/I ratio (p = 0.0003). Compared to REST, there was a significant increase in  
261 LC3B-I protein level at + 0 h (+ 109 ± 103%; ES = 1.1; p = 0.017; Figure 2.A) and at + 3 h (+  
262 82 ± 62%; ES = 1.1; p = 0.04; Figure 2.A). Compared to REST, LC3B-II protein level did not  
263 significantly change at + 0 h (- 20 ± 46%; ES = - 0.32; p = 0.63; Figure 2.B), but significantly  
264 increased at + 3 h (+ 97 ± 102 %; ES = 0.95; p = 0.04; Figure 2.B), and from + 0 h to + 3 h (+  
265 159 ± 129%; ES = 1.2; p = 0.02; Figure 2.B). There was a significant decrease in the LC3B-  
266 II/I ratio immediately (+ 0 h) after exercise (- 65 ± 12 %; ES = - 1.5; p = 0.001; Figure 2.C),

267 followed by a significant increase from + 0 h to + 3 h ( $+ 164 \pm 98\%$ ; ES = 1.5;  $p = 0.001$ ;  
268 Figure 2.C). Protein level of p62 did not significantly change at any time point ( $p > 0.05$ ; Figure  
269 2.D).

270

271 [Insert Figure 2 here]

272

### 273 **Study 2 - Effects of exercise intensity on exercise-induced LC3B and p62 protein changes** 274 **in human skeletal muscle.**

275 There was no main or interaction effect for LC3B-I protein levels ( $p > 0.05$ ; Figure 3.A). There  
276 was no time x intensity effect for LC3B-II protein levels ( $p = 0.85$ ), but there was a main effect  
277 of time ( $p < 0.0001$ ). Compared to REST, there was a significant decrease at + 0 h ( $- 24 \pm 16\%$ ;  
278 90 % CI [- 28, -19%]; ES = - 0.82;  $p = 0.0001$ ; Figure 3.B), but not at + 3 h ( $+ 6 \pm 31\%$ ; 90 %  
279 CI [- 4, 15%]; ES = 0.01;  $p > 0.99$ ; Figure 3.B), and a significant increase between + 0 h and +  
280 3 h ( $+ 40 \pm 38\%$ ; 90 % CI [28, 51%]; ES = 0.85;  $p < 0.0001$ ; Figure 3.B). There was no time x  
281 intensity effect for LC3B-II/I ratio ( $p = 0.85$ ), but there was a main effect of time ( $p < 0.0001$ ).  
282 Compared to REST, there was a significant decrease at + 0 h ( $- 21 \pm 17\%$ ; 90 % CI [- 26, -  
283 16%]; ES = - 0.65;  $p = 0.003$ ; Figure 3.C), but no significant difference at + 3 h ( $+ 10 \pm 45\%$ ;  
284 90 % CI [- 4, 24%]; ES = 0.18;  $p = 0.27$ ; Figure 3.C), and a significant difference between + 0  
285 h and + 3 h ( $+ 40 \pm 45\%$ ; 90 % CI [27, 54%]; ES = 0.67;  $p = 0.0001$ ; Figure 3.C). There was  
286 no main or interaction effect for p62 protein levels (all  $p > 0.05$ ; Figure 3.D).

287

288 [Insert Figure 3 here]

289

### 290 **Study 3 – Effects of high-volume HIIT on resting LC3B and p62 protein levels in human** 291 **skeletal muscle.**

292

293 Resting levels of LC3B-II protein levels significantly increased from PRE to POST ( $+ 132 \pm$   
294  $140\%$ ; 90 % CI [+ 55, 209%]; ES = 0.85;  $p = 0.04$ ; Figure 4.A). There was no significant  
295 training effect on LC3B-I, LC3B-II/I ratio, and p62 protein levels (all  $p > 0.05$ ).

296

297

[Insert Figure 4 here]

298

#### 299 **Study 4 - Exercise-induced changes in autophagy flux in human skeletal muscle.**

300 There was a main effect for LC3B-II protein levels in untreated samples ( $p = 0.017$ ). Compared  
301 to REST there were no significant changes at + 0 h ( $- 26 \pm 23\%$ ; 90 % CI [- 43, - 10%]; ES = -  
302 0.77;  $p = 0.10$ ), at + 2.5 h ( $+ 23 \pm 27\%$ ; 90 % CI [3, 43%]; ES = 0.64;  $p = 0.24$ ), or at + 24 h  
303 ( $+ 8.7 \pm 23\%$ ; 90% CI [-8, 26%]; ES = 0.26;  $p = 0.53$ ). However, relative changes from REST  
304 to + 0 h between the samples from Study 1 and those in Study 2 were comparable ( $- 26\%$  vs -  
305 24% respectively; and ES = - 0.77 vs - 0.82 respectively), suggesting a similar exercise-induced  
306 response in LC3B-II across experiments in the untreated samples.

307

308 For net LC3B-II flux there was no main effect ( $p = 0.27$ ). Compared to REST, effect size  
309 analyses showed a large positive change at + 0 h ( $+ 117 \pm 163\%$ ; 90 % CI [- 3, 237%]; ES =  
310 0.82;  $p = 0.22$ ), at + 2.5 h ( $+ 113 \pm 178\%$ ; 90 % CI [- 18, 244%]; ES = 0.88;  $p = 0.22$ ), and at  
311 + 24 h ( $+ 93 \pm 126\%$ ; 90% CI [1, 126%]; ES = 0.79;  $p = 0.22$ ).

312

313

[Insert Figure 5 here]

314

#### 315 **Discussion**

316 Our study shows that: 1) exercise-induced changes in LC3B protein levels differs between  
317 rodents and humans; 2) exercise-induced changes in LC3B and p62 protein levels appear to be  
318 independent of exercising below or above the MLSS in human skeletal muscle; and 3) the  
319 exercise-induced decrease in LC3B-II protein levels observed in humans were not reflective of  
320 a decrease in autophagy flux.

321 The results of the present study showed that the exercise-induced changes in LC3B protein  
322 levels differ between rodents and humans. In our rat study, there were increased LC3B-I protein  
323 levels 0 to 3 hours following a single endurance exercise session (Figure 2). This was not  
324 observed in our human study, in accordance with previous literature (16). An increase of

325 LC3B-I protein levels may stem from increased LC3B mRNA translation. In fact, LC3B  
326 mRNA expression has been shown to increase following exercise to exhaustion in mice (10),  
327 and an exercise-induced increase in LC3-I protein levels has also been shown in rodents (11).  
328 However, it is difficult to compare across studies as not many studies report the changes of  
329 LC3-I protein levels.

330 In the present study, LC3B-II protein levels were unaltered immediately after exercise in rats  
331 but were significantly increased 3 hours into the recovery. This is in line with previous research  
332 showing that LC3-II is significantly increased in rodents 80 to 180 min from the start of  
333 exercise (4, 16, 26). Due to the incomplete information regarding the antibodies used, it was  
334 impossible to recapitulate the findings for the LC3 subfamily members used in some of the  
335 rodent studies. Future research should address whether the different LC3 subfamily members  
336 are similarly modified following exercise in rodents. Our results show that the protein levels  
337 of the autophagy receptor p62 remained unchanged at all time points in rats. While this is in  
338 contrast to some rodent studies (4, 27), it is in agreement with other findings (10-12, 28). A  
339 possible explanation may relate to the duration of the exercise in the different studies, as the  
340 only two studies reporting an exercise-induced decrease in p62 protein levels did exercise for  
341 at least 110 min (4, 27), and a decrease in p62 was not seen at earlier time points or in the  
342 recovery period (27). On the other hand, p62 protein level has been previously shown to be  
343 decreased 6 hours into the recovery from both low- and moderate-intensity exercise (12),  
344 suggesting a delayed lysosomal degradation of autophagosomes, which may have been missed  
345 by most studies including the present study. It is important to mention that other proteins can  
346 also act as autophagy receptors (e.g., NBR1, OPTN (29)), and how these are altered by exercise  
347 requires further investigation.

348 In contrast to rodents, the findings from our human study show that, independently of  
349 exercising below or above the MLSS, LC3B-II protein levels and the LC3B-II/I ratio were  
350 decreased following exercise and returned to baseline 3.5 hours into the recovery (Figure 3).  
351 This was in accordance with most human studies (13-16), with one exception (17). A major  
352 difference with the study of Brandt, Gunnarsson (17) was the protein analysed. In contrast to  
353 the present study and others where an antibody targeting the LC3B subfamily was utilised (13-  
354 16), Brandt, Gunnarsson (17) used an antibody targeting a combination of LC3A and LC3B.  
355 Whether the protein levels of the different the LC3 subfamily members are differentially  
356 regulated following exercise remains to be elucidated. Interestingly, a proteomic analysis of  
357 human skeletal muscle studies only detected LC3A (30), which may indicate a greater protein

358 abundance of LC3A when compared to the other subfamily members in skeletal muscle. The  
359 present findings also show that LC3B-I protein levels were not altered following exercise,  
360 consistent with previous studies in humans (13, 15). The unchanged LC3B-I protein levels  
361 could be due to unchanged mRNA expression of LC3B or rapid conjugation of LC3-I into  
362 LC3-II and increased autophagosome degradation. The finding of unchanged p62 protein levels  
363 following exercise, independent of exercise intensity, were in accordance with most studies  
364 (13, 15-17). Furthermore, the previously reported role of exercise intensity on p62 protein  
365 changes (14) may not be due to exercise intensity differences between protocols, but possibly  
366 related to other factors such as total work performed.

367 Our data demonstrated that following three weeks of high-volume HIIT there was an increase  
368 in basal LC3B-II protein level, suggesting an increase in autophagosome content (Figure 4).  
369 To the best of our knowledge, this is the first study suggesting that HIIT can lead to increased  
370 autophagosome content but our findings are in line with the results of a previous study where  
371 three weeks of one-legged knee extensor training led to an increase in LC3B-II protein levels  
372 (16). However, others have not shown any effect of endurance training on LC3A/B-II protein  
373 levels, despite an increase in LC3A/B-I protein levels (17). Whether training volume or  
374 intensity are more important for the training-induced changes in LC3B-II requires further  
375 research.

376 A limitation of human studies to date is the use of LC3B-II and p62 protein levels to infer  
377 changes in autophagy flux. This has led to the idea that a decrease in LC3B-II protein levels  
378 following exercise could be reflective of a temporary decrease in autophagy flux (13). In the  
379 present study, a protocol adapted from a rodent study (19) was used to examine, for the first  
380 time, the effects of exercise on *ex vivo* autophagy flux in human skeletal muscle. The results  
381 showed that autophagy flux (measured as net LC3B-II flux) did not decrease immediately after  
382 0, 2.5, or even 24 hours after exercise (Figure 5.A). Although limited by the low number of  
383 participants, the effect size analyses suggested a moderate-to-large increase in *ex vivo*  
384 autophagy flux following exercise (+ 93-117%; ES = 0.79-0.88). Our findings in humans were  
385 in agreement with those from a rodent study showing a similar exercise-induced fold-change  
386 in autophagy flux (10). These findings would suggest that exercise-induced autophagy flux is  
387 similar between rodents and humans (Figure 5.B), despite a different exercise-induced LC3B  
388 protein regulation. The use of an *ex vivo* autophagy flux assay in future human studies will  
389 allow researchers to overcome the limitation of solely relying on static protein markers. Future

390 research should interrogate the autophagy flux response to different stimuli (e.g., inactivity) in  
391 skeletal muscle and with larger sample sizes.

392 The main limitation of the present study is the low sample size and the two different exercises  
393 utilised in our *ex vivo* autophagy flux experiments. Nonetheless, our findings highlight the  
394 value of using this assay in human skeletal muscle studies. Furthermore, our study was limited  
395 to LC3B, whereas the role of other ATG8 family members in exercise and skeletal muscle  
396 autophagy remains unexplored.

397 In conclusion, the results of the current study showed that exercise-induced LC3B protein  
398 changes differ between rodents and humans. This indicates caution must be taken when  
399 extrapolating autophagy protein results from rodents to humans. Furthermore, findings from  
400 the current study show that a reduction in LC3B-II protein levels following exercise in humans  
401 was consistent across exercise intensities but was not indicative of a decrease in autophagy  
402 flux. This suggests that studies should avoid looking at ‘static’ levels of LC3 protein levels and  
403 include autophagy flux assays to provide a more valid assessment of dynamic changes in  
404 autophagy with exercise.

#### 405 **Acknowledgements**

406 The authors would like to thank all the participants for volunteering to take part in these studies.

#### 407 **Conflict of Interest statement**

408 All authors involved in this research declare no conflict of interest.

#### 409 **Funding**

410 This work was supported by an ARC grant to D.J.B (DP140104165).

#### 411 **Author contributions**

412 J.B, C.G, N.A.J, A.J.G, M.L, and D.J.B designed the research. J.B, C.G, N.A.J, A.J.G, E.P,  
413 T.J, and A.G performed the research. J.B, M.L, and D.J.B wrote the manuscript. J.B, C.G,  
414 N.A.J, A.J.G, E.P, T.J, A.G, M.L, and D.J.B revised and approved the manuscript.

415

#### 416 **References:**

- 417 1. Choi, A. M., Ryter, S. W., and Levine, B. (2013) Autophagy in human health and disease. *The*  
418 *New England journal of medicine* **368**, 651-662



- 419 2. Lo Verso, F., Carnio, S., Vainshtein, A., and Sandri, M. (2014) Autophagy is not required to  
420 sustain exercise and PRKAA1/AMPK activity but is important to prevent mitochondrial  
421 damage during physical activity. *Autophagy* **10**, 1883-1894
- 422 3. Call, J. A., Wilson, R. J., Laker, R. C., Zhang, M., Kundu, M., and Yan, Z. (2017) Ulk1-mediated  
423 autophagy plays an essential role in mitochondrial remodeling and functional regeneration  
424 of skeletal muscle. *American journal of physiology. Cell physiology* **312**, C724-c732
- 425 4. He, C., Bassik, M. C., Moresi, V., Sun, K., Wei, Y., Zou, Z., An, Z., Loh, J., Fisher, J., Sun, Q.,  
426 Korsmeyer, S., Packer, M., May, H. I., Hill, J. A., Virgin, H. W., Gilpin, C., Xiao, G., Bassel-Duby,  
427 R., Scherer, P. E., and Levine, B. (2012) Exercise-induced BCL2-regulated autophagy is  
428 required for muscle glucose homeostasis. *Nature* **481**, 511-515
- 429 5. Lira, V. A., Okutsu, M., Zhang, M., Greene, N. P., Laker, R. C., Breen, D. S., Hoehn, K. L., and  
430 Yan, Z. (2013) Autophagy is required for exercise training-induced skeletal muscle adaptation  
431 and improvement of physical performance. *FASEB journal : official publication of the*  
432 *Federation of American Societies for Experimental Biology* **27**, 4184-4193
- 433 6. Melia, T. J., Lystad, A. H., and Simonsen, A. (2020) Autophagosome biogenesis: From  
434 membrane growth to closure. *The Journal of cell biology* **219**
- 435 7. Slobodkin, M. R., and Elazar, Z. (2013) The Atg8 family: multifunctional ubiquitin-like key  
436 regulators of autophagy. *Essays in biochemistry* **55**, 51-64
- 437 8. Nguyen, T. N., Padman, B. S., Usher, J., Oorschot, V., Ramm, G., and Lazarou, M. (2016) Atg8  
438 family LC3/GABARAP proteins are crucial for autophagosome–lysosome fusion but not  
439 autophagosome formation during PINK1/Parkin mitophagy and starvation. *Journal of Cell*  
440 *Biology* **215**, 857-874
- 441 9. Tanida, I., Ueno, T., and Kominami, E. (2004) LC3 conjugation system in mammalian  
442 autophagy. *The international journal of biochemistry & cell biology* **36**, 2503-2518
- 443 10. Vainshtein, A., Tryon, L. D., Pauly, M., and Hood, D. A. (2015) Role of PGC-1 $\alpha$  during acute  
444 exercise-induced autophagy and mitophagy in skeletal muscle. *American journal of*  
445 *physiology. Cell physiology* **308**, C710-719
- 446 11. Zhang, D., Lee, J. H., Kwak, S. E., Shin, H. E., Zhang, Y., Moon, H. Y., Shin, D. M., Seong, J. K.,  
447 Tang, L., and Song, W. (2019) Effect of a Single Bout of Exercise on Autophagy Regulation in  
448 Skeletal Muscle of High-Fat High-Sucrose Diet-Fed Mice. *Journal of Obesity & Metabolic*  
449 *Syndrome* **28**, 175-185
- 450 12. Brandt, N., Dethlefsen, M. M., Bangsbo, J., and Pilegaard, H. (2017) PGC-1 $\alpha$  and exercise  
451 intensity dependent adaptations in mouse skeletal muscle. *PloS one* **12**, e0185993
- 452 13. Kruse, R., Pedersen, A. J., Kristensen, J. M., Petersson, S. J., Wojtaszewski, J. F., and Hojlund,  
453 K. (2017) Intact initiation of autophagy and mitochondrial fission by acute exercise in skeletal  
454 muscle of patients with Type 2 diabetes. *Clinical science (London, England : 1979)* **131**, 37-47
- 455 14. Schwalm, C., Jamart, C., Benoit, N., Naslain, D., Premont, C., Prevet, J., Van Thienen, R.,  
456 Deldicque, L., and Francaux, M. (2015) Activation of autophagy in human skeletal muscle is  
457 dependent on exercise intensity and AMPK activation. *FASEB journal : official publication of*  
458 *the Federation of American Societies for Experimental Biology* **29**, 3515-3526
- 459 15. Moller, A. B., Vendelbo, M. H., Christensen, B., Clasen, B. F., Bak, A. M., Jorgensen, J. O.,  
460 Moller, N., and Jessen, N. (2015) Physical exercise increases autophagic signaling through  
461 ULK1 in human skeletal muscle. *Journal of applied physiology (Bethesda, Md. : 1985)* **118**,  
462 971-979
- 463 16. Fritzen, A. M., Madsen, A. B., Kleinert, M., Treebak, J. T., Lundsgaard, A. M., Jensen, T. E.,  
464 Richter, E. A., Wojtaszewski, J., Kiens, B., and Frosig, C. (2016) Regulation of autophagy in  
465 human skeletal muscle: effects of exercise, exercise training and insulin stimulation. *The*  
466 *Journal of physiology* **594**, 745-761
- 467 17. Brandt, N., Gunnarsson, T. P., Bangsbo, J., and Pilegaard, H. (2018) Exercise and exercise  
468 training-induced increase in autophagy markers in human skeletal muscle. *Physiological*  
469 *reports* **6**, e13651-e13651



- 470 18. Yoshii, S. R., and Mizushima, N. (2017) Monitoring and Measuring Autophagy. *Int J Mol Sci*  
471 **18**, 1865
- 472 19. Martinez-Lopez, N., Tarabra, E., Toledo, M., Garcia-Macia, M., Sahu, S., Coletto, L., Batista-  
473 Gonzalez, A., Barzilai, N., Pessin, J. E., Schwartz, G. J., Kersten, S., and Singh, R. (2017)  
474 System-wide Benefits of Intermeal Fasting by Autophagy. *Cell metabolism* **26**, 856-871.e855
- 475 20. Jamnick, N. A., Botella, J., Pyne, D. B., and Bishop, D. J. (2018) Manipulating graded exercise  
476 test variables affects the validity of the lactate threshold and [Formula: see text]. *PloS one*  
477 **13**, e0199794
- 478 21. Billat, V. L., Sirvent, P., Py, G., Koralsztein, J. P., and Mercier, J. (2003) The concept of  
479 maximal lactate steady state: a bridge between biochemistry, physiology and sport science.  
480 *Sports medicine (Auckland, N.Z.)* **33**, 407-426
- 481 22. Granata, C., Oliveira, R. S. F., Little, J. P., and Bishop, D. J. (2020) Forty high-intensity interval  
482 training sessions blunt exercise-induced changes in the nuclear protein content of PGC-1 $\alpha$   
483 and p53 in human skeletal muscle. *American journal of physiology. Endocrinology and*  
484 *metabolism* **318**, E224-e236
- 485 23. Granata, C., Oliveira, R. S. F., Little, J. P., Renner, K., and Bishop, D. J. (2016) Mitochondrial  
486 adaptations to high-volume exercise training are rapidly reversed after a reduction in  
487 training volume in human skeletal muscle. *FASEB journal : official publication of the*  
488 *Federation of American Societies for Experimental Biology* **30**, 3413-3423
- 489 24. Granata, C., Oliveira, R. S., Little, J. P., Renner, K., and Bishop, D. J. (2016) Training intensity  
490 modulates changes in PGC-1 $\alpha$  and p53 protein content and mitochondrial respiration,  
491 but not markers of mitochondrial content in human skeletal muscle. *FASEB journal : official*  
492 *publication of the Federation of American Societies for Experimental Biology* **30**, 959-970
- 493 25. Yamada, E., and Singh, R. (2012) Mapping autophagy on to your metabolic radar. *Diabetes*  
494 **61**, 272-280
- 495 26. Jamart, C., Naslain, D., Gilson, H., and Francaux, M. (2013) Higher activation of autophagy in  
496 skeletal muscle of mice during endurance exercise in the fasted state. *American journal of*  
497 *physiology. Endocrinology and metabolism* **305**, E964-974
- 498 27. Pagano, A. F., Py, G., Bernardi, H., Candau, R. B., and Sanchez, A. M. (2014) Autophagy and  
499 protein turnover signaling in slow-twitch muscle during exercise. *Medicine and science in*  
500 *sports and exercise* **46**, 1314-1325
- 501 28. Fritzen, A. M., Frøsig, C., Jeppesen, J., Jensen, T. E., Lundsgaard, A. M., Serup, A. K.,  
502 Schjerling, P., Proud, C. G., Richter, E. A., and Kiens, B. (2016) Role of AMPK in regulation of  
503 LC3 lipidation as a marker of autophagy in skeletal muscle. *Cellular signalling* **28**, 663-674
- 504 29. Behrends, C., and Fulda, S. (2012) Receptor proteins in selective autophagy. *Int J Cell Biol*  
505 **2012**, 673290-673290
- 506 30. Gonzalez-Freire, M., Semba, R. D., Ubaida-Mohien, C., Fabbri, E., Scalzo, P., Højlund, K.,  
507 Dufresne, C., Lyashkov, A., and Ferrucci, L. (2017) The Human Skeletal Muscle Proteome  
508 Project: a reappraisal of the current literature. *Journal of Cachexia, Sarcopenia and Muscle* **8**,  
509 5-18

510

511

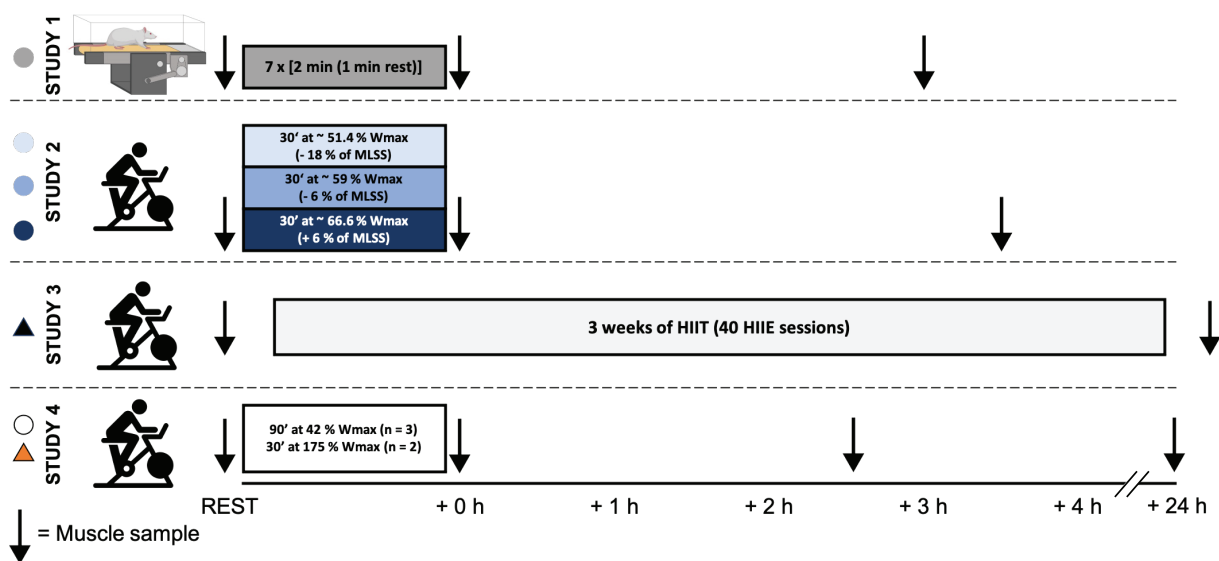

512  
513

514 Figure 1. Schematic representation of the four different experimental studies with the time-  
515 course of the muscle samples collected. MLSS = Maximal lactate steady state; HIIT = High-  
516 intensity interval training; HIIE = High-intensity interval exercise;  $\dot{W}_{max}$  = maximal aerobic  
517 power determined from a graded exercise test. Created with BioRender.com

518

519 Table 1. Descriptive data of the human participants recruited for studies 2, 3, and 4. Data are  
 520 mean  $\pm$  SD.

|                     | Age<br>(y)        | $\dot{V}O_{2peak}$<br>(mL·min <sup>-1</sup> ·kg <sup>-1</sup> ) | Trial       | Relative<br>Exercise<br>Intensity<br>(% $\dot{W}_{max}$ ) | Absolute<br>Exercise Intensity<br>(W) |
|---------------------|-------------------|-----------------------------------------------------------------|-------------|-----------------------------------------------------------|---------------------------------------|
| Study 2<br>(n = 10) | 27.5<br>$\pm$ 7.7 | 55.8<br>$\pm$ 10.0                                              | - 18 % MLSS | 51 $\pm$ 4                                                | 181 $\pm$ 39                          |
|                     |                   |                                                                 | - 6 % MLSS  | 59 $\pm$ 4                                                | 207 $\pm$ 45                          |
|                     |                   |                                                                 | + 6 % MLSS  | 67 $\pm$ 5                                                | 234 $\pm$ 51                          |
| Study 3<br>(n = 9)  | 22.4<br>$\pm$ 5.2 | 47.0<br>$\pm$ 7.5                                               |             | -                                                         |                                       |
| Study 4<br>(n = 5)  | 30.0<br>$\pm$ 7.3 | 48.1<br>$\pm$ 4.4                                               | SIE         | 175 $\pm$ 21                                              | 444 $\pm$ 179                         |
|                     |                   |                                                                 | MICE        | 42 $\pm$ 2                                                | 142 $\pm$ 35                          |

521

522

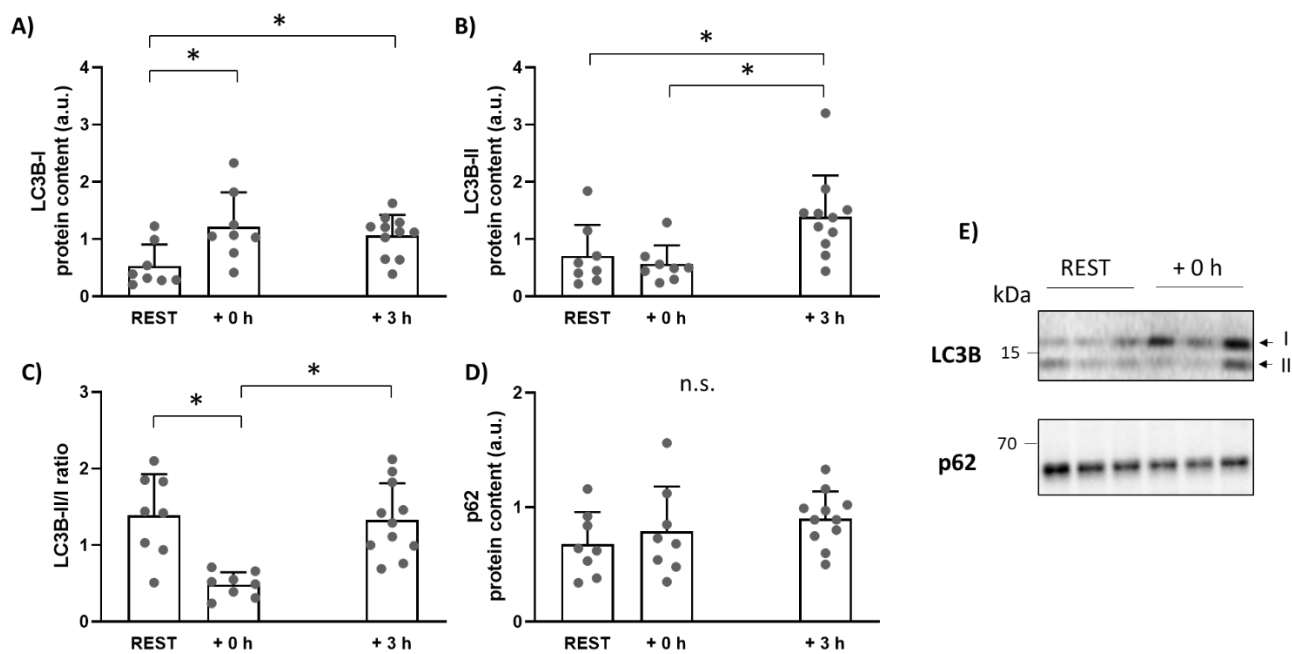

523

524

525 Figure 2. Effects of exercise on A) LC3B-I and; B) LC3B-II protein levels; C) the LC3BII/I  
526 ratio and; D) p62 protein levels in the soleus muscle of Wistar rats; E) representative blots of  
527 LC3B and p62 protein. Data were analysed using one-way ANOVA; \* =  $p < 0.05$ . Bars are  
528 shown as mean + SD; n.s = not significant.

529

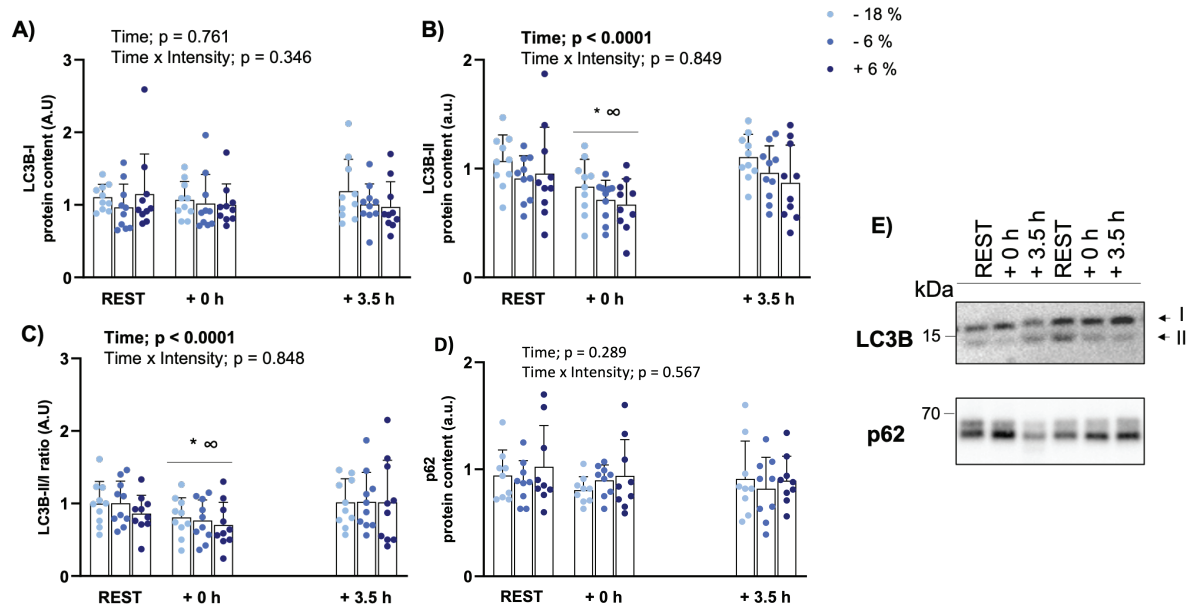

530

531 Figure 3. Protein levels of A) LC3B-I and; B) LC3B-II at rest, as well as 0 h and 3.5 h after the  
 532 end of exercise; C) the LC3BII/I ratio and; D) p62 protein levels at rest, 0 h and 3.5 h after the  
 533 end of exercise; E) representative blots of LC3B and p62 protein. Participants performed the  
 534 exercise at three different intensities (-18% = light blue, -6% = normal blue, and +6% = dark  
 535 blue of the individually determined maximal lactate steady state).  $n = 9$  for p62,  $n = 10$  for  
 536 LC3B. \* = different than REST;  $\infty$  = different from + 3.5 h. Bars shown are mean + SD.

537

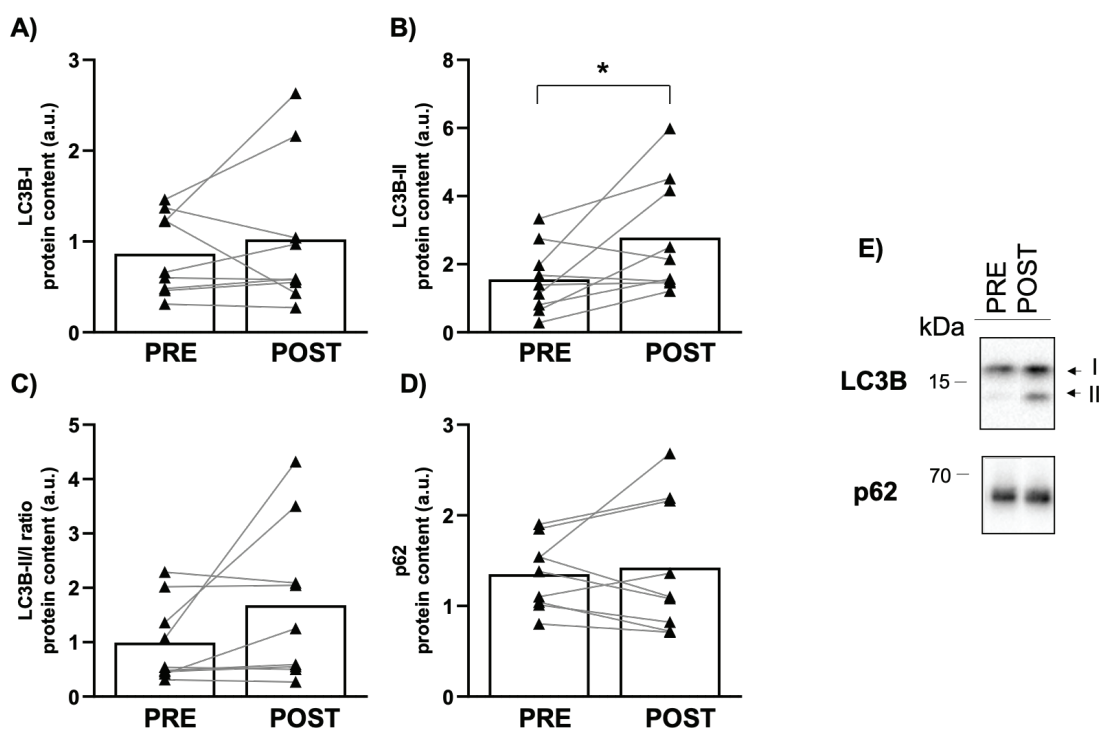

538

539 Figure 4. Protein levels of A) LC3B-I and B) LC3B-II in PRE and POST training samples; C)  
540 the LC3BII/I ratio and D) p62 protein levels in PRE and POST training samples; E)  
541 representative blots of LC3B and p62 proteins. \* = significantly different than PRE training  
542 sample ( $p < 0.05$ ). Individual and mean changes are shown.

543

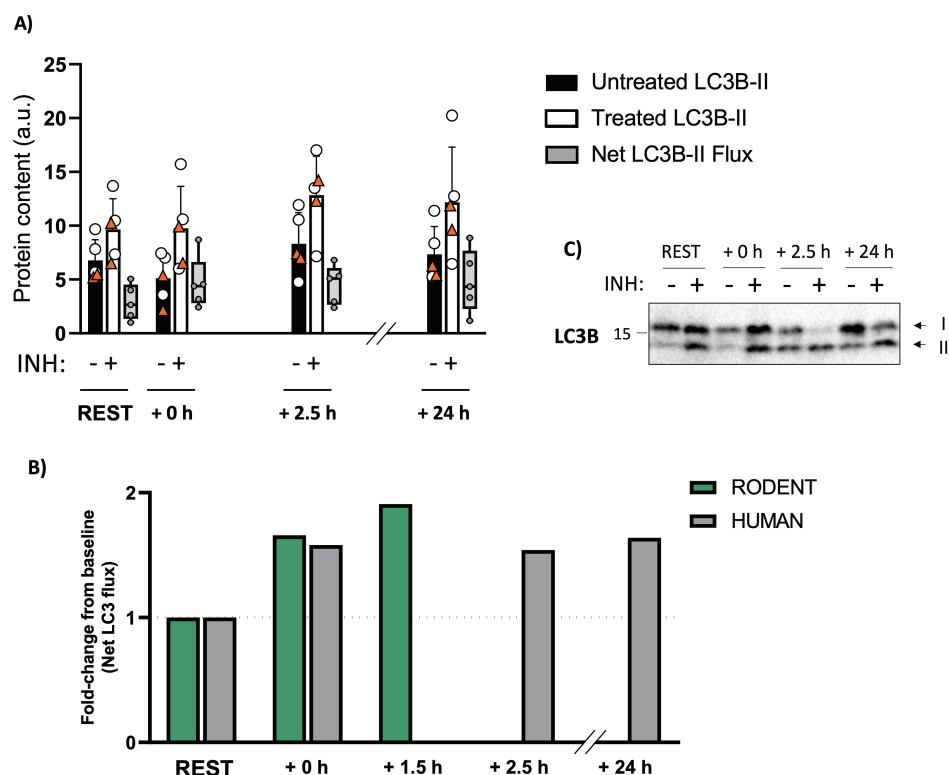

544

545 Figure 5. A) LC3B-II protein levels from untreated (black bars) and treated samples (white  
 546 bars), and the net LC3B-II flux (in grey; calculated by subtracting untreated LC3B-II protein  
 547 levels from treated sample). C) Representative blot. Orange triangles represent participants  
 548 performing SIE (n = 2); white circles represent participants performing MICE (n = 3). B) Fold-  
 549 change following exercise in the net LC3-II flux from the present study (LC3B-II, human) and  
 550 a published rodent study (LC3-II, adapted from (10)). Bars for the treated and untreated  
 551 samples display the mean + SD. Individual data points along with box and whisker plots are  
 552 shown for net LC3B-II flux. INH = inhibitors NH<sub>4</sub>Cl (40 mM) and Leupeptin (100 μM) added  
 553 to the treated sample.
